# Supplementary material
Source: PubMed Central journal article supplement (PMC10330936)
Supplement: NIHMS1906602-supplement-Supplementary_Figure_2.pdf [file NIHMS1906602-supplement-Supplementary_Figure_2.pdf]

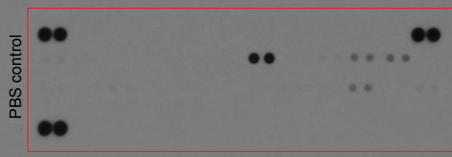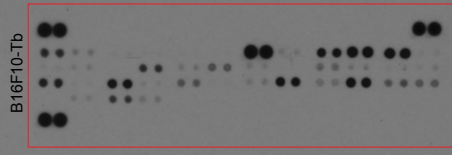

Used in Extended Data Figure 9c

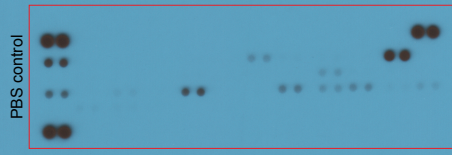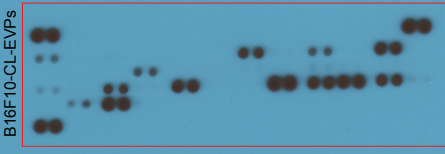

Used in Extended Data Figure 9e

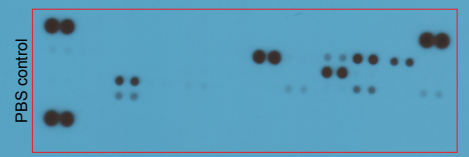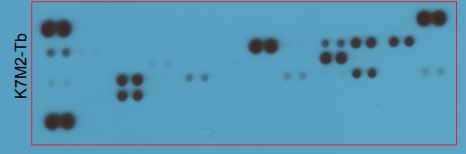

Used in Extended Data Figure 9d

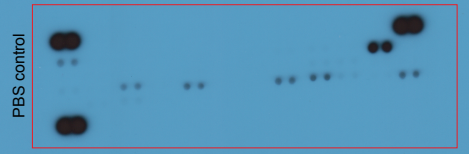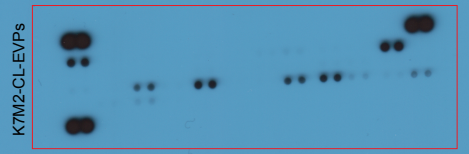

Used in Extended Data Figure 9f
