# Supplementary material
Source: PubMed Central journal article supplement (PMC10330936)

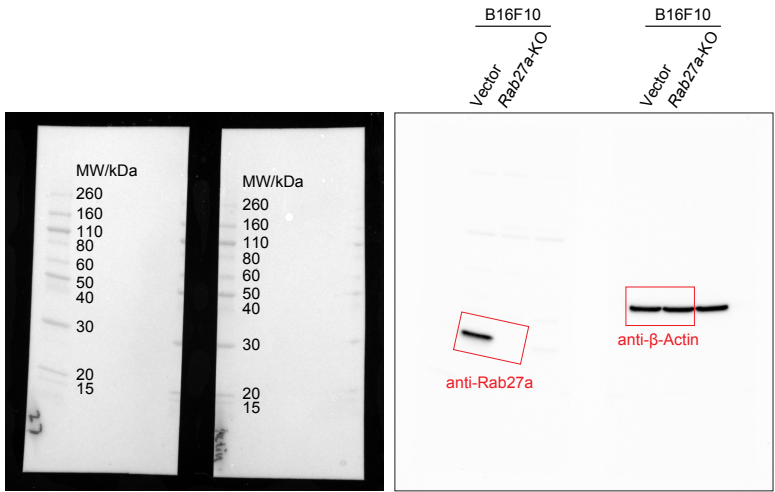

Used in Extended Data Figure 6a

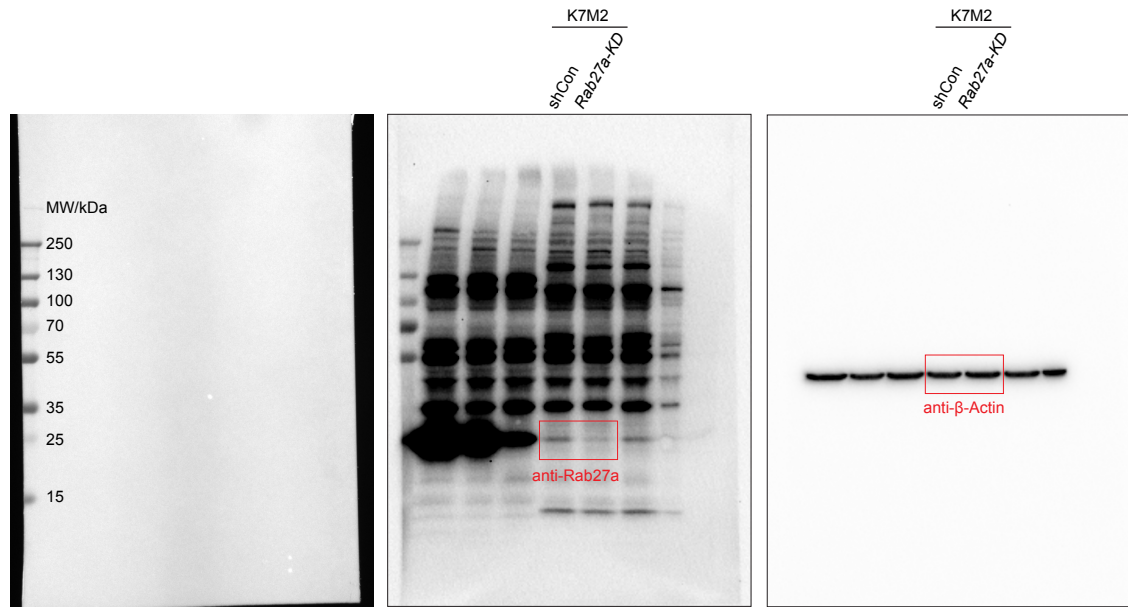

Used in Extended Data Figure 6b

Supplementary Figure 1

Supplement: NIHMS1906602-supplement-Supplementary_Figure_1.pdf [file NIHMS1906602-supplement-Supplementary_Figure_1.pdf]
